# Registered Report: The effect of systematic endurance training in treatment of women with lipedema - The LipidEx study

Julie Caroline Sæther<sup>1,2\*</sup>, Ada Nilsen Nordeidet<sup>1,2</sup>, Randi Merete Presthus<sup>3</sup>, Randi Undebakke<sup>3</sup>, Lise Madsen<sup>4</sup>, Ina Lønnebakken Norberg<sup>5</sup>, Sunniva Kwapeng<sup>6</sup>, Katrine Mari Owe<sup>7</sup>, Gabriele Erbacher<sup>8</sup>, Tobias Bertsch<sup>8</sup>, Thomas Dieterle<sup>8</sup>, Siren Nymo<sup>9,10,11</sup>, Guro Giskeødegård<sup>9</sup>, Turid Follestad<sup>12,13</sup>, Arnt Erik Tjønnå<sup>1</sup>, Anja Bye<sup>1,2</sup>.

<sup>1</sup> Department of Circulation and Medical Imaging, Norwegian university of Science and Technology, Norway

<sup>2</sup> Clinic of Cardiology, St.Olavs hospital, Trondheim, Norway

<sup>3</sup> Clinic of Rehabilitation, St.Olavs hospital, Trondheim, Norway

<sup>4</sup> Department of Clinical Medicine, University of Bergen, Norway

<sup>5</sup> Heimdal Physiotherapy Clinic, Trondheim, Norway

<sup>6</sup> Trondheim and surrounding area lymphedema and lipedema association, Trondheim, Norway

<sup>7</sup> Norwegian Research Centre for Women's Health, Oslo University Hospital, Oslo, Norway

<sup>8</sup> Foeldiclinic Hinterzarten – European Center of Lymphology in the Black Forest, Germany

<sup>9</sup> The Department of Public Health and Nursing, Faculty of Medicine and Health Sciences, Norwegian University of Science and Technology (NTNU), Trondheim, Norway

<sup>10</sup> Nord-Trøndelag Hospital Trust, Clinic of Surgery, Namsos Hospital, Norway

<sup>11</sup> Center for Obesity Research and Innovation, Clinic of Surgery, St. Olavs hospital – Trondheim University Hospital, Trondheim, Norway

<sup>12</sup> Department of Clinical and Molecular Medicine, Norwegian University of Science and Technology, Trondheim, Norway.

<sup>13</sup> Clinical Research Unit Central Norway, St. Olavs Hospital, Trondheim Norway

\* Corresponding author: Julie Caroline Sæther ([julie.c.sathertnu.no](mailto:julie.c.sathertnu.no))

## Abstract

Lipedema is a chronic adipose tissue disorder that primarily affects women. The etiology remains unclear and involves abnormal buildup of fat mainly in the lower limbs. It causes physical and psychological morbidity, often with negative impact on daily life. Effective treatment options are still limited, primarily involving conservative treatment such as compression therapy and pain reliever. As endurance training is shown to have beneficial effects on both pain and obesity management in patients suffering of other disorders, LipidEx aims to explore the potential of high-intensity interval training (HIIT) as a novel therapeutic option for women with lipedema. We will perform a cross-over randomized controlled trial (RCT) exploring the effects of 12 weeks of HIIT compared to a control period of usual care. The primary outcome is changes in pain, and secondary outcomes are changes in adipose tissue mass and quality of life.

## Introduction

Lipedema is a complex chronic adipose tissue disorder that primarily affects women<sup>1</sup>. The condition is characterized by abnormal and disproportional adipose tissue distribution, with excess subcutaneous fat deposits mainly in the lower extremities.<sup>2</sup> Lipedema can result in significant physical and psychological morbidity, including chronic pain or discomfort, restricted mobility, psychological vulnerability and thereby impaired quality of life.<sup>3-9</sup>

There is limited research and knowledge on lipedema and a lack of consensus regarding etiology, diagnosis, and treatment. However, data suggest that lipedema is a hormonally driven disorder with a genetic predisposition.<sup>10</sup> Hormonal changes during puberty, pregnancy, and menopause are known to exacerbate lipedema symptoms, and having a family history of lipedema, obesity, and/or a sedentary lifestyle are known aggravating risk factors.<sup>10-13</sup> Nevertheless, patients are often unrecognized or misdiagnosed with obesity, which delay both diagnosis and treatment of these patients.<sup>10,14,15</sup>

Current treatment options for lipedema are limited and a strong evidence base is lacking. While current interventions, such as compression therapy, manual lymphatic drainage, and liposuction, may provide some symptomatic relief, they do not address the underlying pathology of lipedema.<sup>10,16,17</sup> Exercise is in general proposed as a potential non-surgical treatment option, with the intention to reduce adipose tissue mass, inflammation, and pain, and to improve lymphatic and circulatory function.<sup>10,18</sup> However, only a few studies have explored the effects of exercise in lipedema patients and there is currently no consistency to whether exercise improves lipedema.<sup>19,20</sup> Despite the lack of knowledge, the existing treatment guidelines for lipedema promote a healthy lifestyle with weight control measures, including physical activity.<sup>21</sup> For the general population, the World Health Organization (WHO) recommends a weekly effort of either 150–300 minutes of moderate intensity physical activity, 75–150 minutes of high intensity, or a combination of the two.<sup>22</sup> Unfortunately, there are no specific guidelines for physical activity for individuals with chronic pain.<sup>22,23</sup> Several studies have examined what types of exercise that are suitable for achieving pain relief, as well as the duration and intensity required to achieve this.<sup>23,24</sup> It appears that a minimum of ten minutes of exercise is necessary to achieve a pain-relieving

effect.<sup>25-27</sup> At the same duration of exercise, higher intensities, as quantified by maximal oxygen uptake ( $VO_{2max}$ ) result in a stronger pain-relieving effect.<sup>28,29</sup> Several studies have concluded that strenuous physical activity reduces the risk of sickness absence and disability to a greater extent than moderate and light physical activity.<sup>30,31</sup> Furthermore, continuity in physical activity appears to be an important element for individuals with chronic pain.<sup>32</sup> Potential contributors to the positive effects of continuity on pain relief may include the long-term impact of regular exercise on factors such as stress, sleep, physical function, depression, anxiety, well-being, and disease development.<sup>33-37</sup> In addition, physical activity seems to be well tolerated by patient groups with chronic pain, and studies report high level of relief and compliance.<sup>38-41</sup> Considering this, regular endurance training at high intensity may have the potential to improve pain levels also in lipedema patients.

In addition to the effects on chronic pain, exercise training at high intensity has previously been shown to reduce body mass and to improve body composition in obese and overweight individuals.<sup>41-43</sup> Exercise training at high intensity is also known to reduce cardiovascular risk factors and improve metabolic fitness in adults with overweight and obesity.<sup>41</sup> Whether these observations is transferable to patients with lipedema remains as open questions.

The etiology of lipedema is unknown, but progression is associated with chronic inflammation and abnormal immune response.<sup>10</sup> In line with this, adipocyte hypertrophy with increased fibrosis and a distinct gene expression profile associated with infiltration of macrophages is demonstrated in lipedema tissue.<sup>44</sup> Thus, integrating analyses of blood and fat samples into exercise-training studies for patients with lipedema can facilitate a deeper understanding of the condition's pathophysiology and processes associated with improvements in lipedema-related symptoms. These analyses will provide insights into cellular and molecular mechanisms governing the systemic and local effects of exercise which is crucial for developing more effective treatments and management strategies for individuals affected by lipedema.

Recently, our research group was the first to examine the effects of high intensity interval training (HIIT) in women with lipedema (ongoing trial, ClinicalTrials.gov NCT05488977). This feasibility study confirmed that HIIT is well tolerated among lipedema patients, and 22 patients have so far completed the 8-week exercise intervention without any adverse events occurring. Furthermore, all of the participants who attended the first exercise session, also completed the rest of the study, indicating good adherence. Based on this, HIIT may represent a promising treatment strategy for lipedema patients that may improve current guidelines for lipedema management and contribute to a change in clinical practice.

To pave the way for more effective and targeted interventions, we now aim to investigate the effects of a 12-week supervised HIIT intervention on pain levels, body composition (including adipose tissue mass) and quality of life in women with lipedema (**Table 1**). We will supplement this with exploratory analyses of inflammatory markers, metabolites, and lipoprotein subfractions in blood and adipose tissue samples to gain insights on cellular changes induced by HIIT in lipedema patients.

## Primary aim

Determine whether 12 weeks of HIIT improve pain levels in women with lipedema.

## Secondary aims

Determine whether 12 weeks of HIIT affects the following parameters:

- I. reduces total adipose tissue mass and adipose tissue mass in the lower limbs.
- II. improves health-related quality of life.

## Hypotheses

Our **1<sup>st</sup> hypothesis** is that 12 weeks of HIIT will improve pain levels in lipedema patients. Our **2<sup>nd</sup> hypothesis** is that the HIIT will I) alter body composition by decreasing adipose tissue mass, especially in the lower limbs, and II) improve quality of life.

## Goals and deliverables

The short-term goal is to establish the first evidence of the effects of HIIT in women with lipedema. The long-term goal is to improve the guidelines for treatment strategies of lipedema. The main deliverables from LipidEx includes increased knowledge of the effects of HIIT on pain, adipose tissue, body composition, and quality of life in women with lipedema. The findings may have significant value for lipedema management and potential to change clinical practice. By investigating the effects of HIIT in both the physiological and psychological aspects of lipedema, this project may provide a valuable foundation for the development of evidence-based, patient-centered treatment approaches.

# Methods

## Ethics information

The study will be approved by the Regional Committee for Medical Research Ethics (XXX) and will be performed in line with the Declaration of Helsinki and Good Clinical Practice. Data Protection Impact Assessment (DPIA) will be performed and approved by the Department of Circulation and Medical Imaging at the Norwegian University of Science and Technology (NTNU). Informed consent will be obtained from all participants. Participants who complete the trial will receive a free activity tracker. The study is register in clinicaltrials.gov (NCT06558851)

## Design

This study will follow the Standard Protocol Items: Recommendations for Interventional Trials (SPIRIT) reporting guidelines.<sup>45</sup>

## Study design and participants

We will conduct a crossover randomized controlled trial (RCT) involving 58 women diagnosed with lipedema. To be eligible for participation, women must be between 18 and 65 years old and have a confirmed diagnosis of lipedema. Exclusion criteria include ongoing eating disorders and orthopedic limitations that prevent exercise training. Eligible participants will be randomized

(1:1) using block randomization in eForsk to either the exercise intervention group or the control group. The exercise intervention group will undergo 12 weeks of high-intensity interval training (HIIT), tailored to each participant's fitness level and the severity of their lipedema. The control group will continue their usual lifestyle during this period. Following the 12-week intervention, there will be a 12-week wash-out period during which all participants will resume their normal activities. After the wash-out period, participants will switch groups, allowing all included participants to receive the exercise intervention and potentially experience the benefits of HIIT. In total, the study duration for each participant will be 9 months.

### **Recruitment**

Patients will be recruited in Trøndelag, Norway, primarily through The Clinic of Rehabilitation at St. Olavs Hospital and the social media channels of the Norwegian Lymphedema and Lipedema Foundation (NLLF). Additionally, posters will be displayed at general practitioner offices and various physiotherapy clinics in the Trondheim area. Eligible patients will receive comprehensive information about the study and will be given at least one week to consider their participation.

### **Exercise intervention**

Exercise testing and training will be conducted at state-of-the-art exercise training facility at the Norwegian University of Science and Technology (NTNU), the *NextMove* Core facility, supported by highly experienced staff. The exercise intervention group perform three sessions of HIIT per week for 12 weeks. HIIT involves 4 times 4-minutes intervals at 85-95% of maximal heart rate (HRmax) with 3-minutes active breaks (~60% HRmax) between the intervals. Two HIIT sessions are supervised at the *NextMove* core facility, and performed on treadmills or spinning bikes, while the last session of HIIT is unsupervised. In this unsupervised session, swimming will be recommended based on the potential benefits gained from compression. The criteria for adequate compliance to the exercise intervention program will be set to  $\geq 80\%$ . With standardized templated from the *NextMove* core facility, the participants are required to write a diary of their physical activity during the entire study period, including the exercise intervention period, the wash-out period, and the control period.

### **Data collection**

During the first study visit, participants will be randomized into groups and receive comprehensive information about the study and all included procedures. Data collection will occur primarily on four separate test days: before and after both the exercise intervention period and the control period. On these test days, anthropometric and physiological measurements will be taken, questionnaires will be completed, and fasting blood samples and tissue biopsies will be collected.

General information, including details on lipedema (type and morphological stage, and time of diagnosis), comorbidities, sleep patterns, and the use of medications, supplements, and clinical aids (e.g., compression aids and their frequency of use), will also be gathered.

Each test day will last approximately three hours. During this time, fasting blood samples and anthropometric measurements will be taken first, followed by a light meal, completion of questionnaires, and performance of physiological measurements.

Additionally, participants who consent to adipose tissue biopsies will have two samples collected: one within five days before the first exercise session and one within five days after the final exercise session.

### **Pain registration**

Pain will be registered before and after both the intervention period and the control period using the RAND-36 health survey (Pain Dimension) (**primary endpoint**).<sup>46</sup> RAND-36 (also known as SF-36) includes two questions designed to measure the intensity of pain and the extent to which pain interferes with normal work (both outside the home and housework). The first question assesses the intensity of pain experienced over the past four weeks with six response options from “none” to “very severe”. The second question evaluates the degree to which pain has interfered with daily activities and work with five response options from “not at all” to “extremely”. In addition, pain will be registered before and after both the intervention period and the control period using the questionnaire Brief Pain Inventory (BPI)<sup>40</sup>. This questionnaire includes four questions that assess the severity of pain right now and at its worst, least, and average. Each question gives a possible answer of 0 to 10, where 0 means no pain and 10 is the worst pain you can imagine. The four BPI questions contribute with the same weight, and they are combined to a final pain severity score with a range from 0 to 40. The results from RAND-36 and BPI will be evaluated separately. Whereas both tools assess pain, the BPI provides a deeper and more detailed assessment of pain characteristics and functional impact compared to the broader, more generalized assessment provided by the RAND-36 pain dimension. However, the questionnaires focus on different timeframes, as RAND-36 assesses pain over a retrospective period of the past 4 weeks whereas BPI assess pain over the past 24 hours or at the present moment (current pain intensity). Potentially, RAND-36 can be more useful for assessing chronic pain, and BPI for assessing more current pain intensity. However, the most suitable tool for assessing pain specifically in lipedema has yet to be determined.

### **Anthropometric measurements**

Body composition, including weight (kg), body mass index ( $\text{kg}/\text{m}^2$ ), muscle mass (kg), adipose tissue mass (%), basal metabolic rate (kcal), and mineral status (kg), will be measured non-invasively using the bioimpedance instrument InBody 770 (Biospace CO, Ltd, Seoul, Korea). The instrument provides total adipocyte mass and adipose tissue mass in the lower limbs (**secondary endpoints**). The height (m) will be measured without shoes. The circumference (cm) of the waist, hip, right calf, and right thigh will be measured with standard procedures at *NextMove*, and the waist-to-hip ratio (cm/cm) will be calculated. A measuring board will be used to ensure similar site for pre- and post-measurement of the right calf and thigh.

### **Quality of life**

The RAND-36 questionnaire will be used to detect potential changes in health-related quality of life and data will be collected before and after both the intervention period and the control

period (**secondary endpoint**).<sup>46</sup> This questionnaire includes 36 questions covering eight health domains, including vitality, physical functioning, bodily pain, general health perceptions, physical role functioning, emotional role functioning, social role functioning, and mental health. Each domain is scored on a scale from 0 to 100, where the scaled scores are weighted sums of all questions within each of the eight domains. A higher score indicates better health and well-being.

### **Physiological measurements**

Blood pressure will be measured in a sitting position after minimum five minutes rest in a quiet room with a handheld sphygmomanometer (Tyco, 5098-02CB, USA) by trained personnel. At the pre- and post-tests, the blood pressure will be measured at the same time-point of the day for each participant. The first reading will be discarded and the mean of the next three consecutive readings will be used. Additional readings will be required if the coefficient of variation is above 15%.

Maximal oxygen uptake ( $VO_{2max}$ ) will be measured using ergospirometry (Metalyzer II, Cortex Biophysik GmbH, Leipzig, German) supervised by qualified personnel. To demonstrate cardiometabolic effects from the HIIT intervention,  $VO_{2max}$  will be measured during uphill treadmill walking or running. A 10-minute warm-up (~60% of HRmax) will be performed before increasing the workload (speed or incline) every minute until exhaustion. The criteria for reaching  $VO_{2max}$  is a levelling off oxygen uptake ( $VO_2$ ) despite increased workload, and a respiratory exchange ratio of  $\geq 1.05$ . HR will be measured continuously during the test with Polar belt and watch (Polar, Polar Electro, Kempele, Finland), and the data will be used to determine HRmax.

### **Blood samples and adipose tissue biopsies**

Four fasting venous blood samples will be drawn by qualified personnel and by standard in-hospital procedures at St.Olavs Hospital. Directly after collection, one 3mL EDTA-tube and one 3mL Li-heparin-tube will be sent to routine biochemical analyses at St. Olavs hospital for measuring glucose, HbA1C, triglycerides, HDL-cholesterol, total cholesterol, serum ferritin and hs-CRP. The two remaining tubes (serum and EDTA) will be centrifuged, aliquoted, and stored in the LipidEx biobank at  $-80^{\circ}\text{C}$  for explorative analyses.

Two adipose tissue biopsies will be collected by experienced personnel from the Research outpatient clinic at St.Olavs Hospital before and after the exercise intervention. The collected adipose biopsies will be used to advance our physiological understanding of exercise-induced effects on adipose tissue in lipedema patients. To ensure patient comfort during the procedure, local anesthesia will be administered at the site of biopsy to minimize pain and discomfort associated with the needle insertion. The proposed methodology will adhere to rigorous sterilization protocols, including the use of sterile equipment, gloves, and disinfection procedures. A fine needle is used to avoid the need for extensive incisions and to reduce patient discomfort and recovery time. One biopsy will be snap-frozen in liquid nitrogen and stored at  $-80^{\circ}\text{C}$  for later explorative analyses. Another biopsy will be placed in histology cassettes and fixed in 4% formaldehyde in 0.1 M phosphate buffer for 24 hours. The samples will be dehydrated, embedded in paraffin, sectioned, and stained with hematoxylin and eosin at the general lab at the Institute for Circulation and Medical Imaging, NTNU in later explorative analyses. Picosirius

red and the Elastica van Gieson staining kit will be used to evaluate collagen content and fibrosis, respectively.

## **Explorative analyses**

These will be reported under the heading explorative analyses in Stage 2

## **Sampling plan**

### **Statistical power**

As lipedema is a disease that just recently has received more attention in research, there is limited data available in the literature to make an accurate prediction of the expected size of the effect of HIIT on pain levels in lipedema patients. Thus, for calculating the number of patients needed to obtain a power of 80% at a significance level of 0.05, we used data from our recent feasibility study (ongoing trial, ClinicalTrials.gov NCT05488977). 22 patients have so far completed the feasibility study, and we used the collected data and observations from these participants. The mean self-reported pain level at baseline for the lipedema patients were 55 points (based on RAND-36), and the standard deviation was 23. We consider a reduction in pain levels of 10 points to be clinically relevant, which equals a change to 65 points (inversed pain scale). Based on this, a sample size of 44 participants would be included in the study to achieve a power of 80% at a significance level of 0.05 (assuming a correlation of 0.5 between pre- and post-measures of pain). When accounting for up to 30% drop out (due to the length of the trial), we would need to include 58 patients.

## **Analysis Plan**

### **Pre-processing steps**

Data is collected by the electronic case report form (eCRF) eFORSK. After data cleaning (searching for data entry errors or outliers), the database will be locked, and data will be extracted as sav files and csv files for SPSS and R, respectively. The following statistical analyses will be performed using SPSS v.21 and RStudio.

Efficacy of the intervention will be assessed on an intent-to-treat approach where all trial data will be analyzed regardless of compliance to the intervention. In addition, per-protocol analyses will be conducted where we include participants who have completed at least 80% of the planned exercise training sessions (including both the supervised and non-supervised sessions). Interim analyses are not planned. Sample description will be done via frequencies and corresponding percentages, medians (with interquartile range), or means (with standard deviation).

### **Planned analyses**

#### **Pain – Primary endpoint**

We will apply linear mixed models (LMM) with repeated measures (random intercept model) using age and baseline adipose tissue mass (%) in the lower limbs as covariates to compare the changes in pain levels during the intervention period as compared to the control period. Model assessment using various types of residual analyses may lead to performing the LMM on a transformed scale.



### **Adipose tissue mass (%) – Secondary endpoint**

We will apply LMM with repeated measures (random intercept model) using age as covariate to compare the changes in adipose tissue mass (both total and in the lower limbs) during the intervention period as compared to the control period. Model assessment using various types of residual analyses may lead to performing the LMM on a transformed scale.

### **Quality of life – Secondary endpoint**

We will apply LMM with repeated measures (random intercept model) using age and baseline adipose tissue mass (%) in the lower limbs as covariates to compare the changes in quality of life during the intervention period as compared to the control period. Model assessment using various types of residual analyses may lead to performing the LMM on a transformed scale.

### **Contingency Analysis**

#### **Pain Reduction Impact on Secondary Outcomes**

If a significant reduction in pain is observed, we will perform mediation analysis using appropriate models, such as ordinal generalized linear mixed models (GLMMs), to explore whether changes in secondary outcomes (total adipocyte mass (%), adipocyte mass in lower limbs (%), or quality of life) mediate the relationship between HIIT and pain reduction.

### **Responder analysis**

Based on the results we will identify responders and non-responders to HIIT based on pain reduction. Those who achieved a 5-point reduction in pain levels after HIIT will be assigned as responders, and those with no reduction or even an increase in pain levels during the HIIT will be assigned as non-responder. Those with 0-5-point reduction in pain levels will be excluded from responder analysis. Then we will compare secondary outcomes between responders and non-responders using t-tests or Mann-Whitney U tests if normality assumptions are not met.

## **Data availability**

We commit to share raw data and materials on acceptance of the Stage 2 manuscript.

## **Code availability**

We commit to share all codes on acceptance of the Stage 2 manuscript. The codes will be made open access at this location: <https://github.com/anjabye/LipidEx>.

## **References**

- 1 Bertsch, T., Erbacher, G. & Elwell, R. Lipoedema: a paradigm shift and consensus. *J Wound Care* **29**, 1-51, doi:10.12968/jowc.2020.29.Sup11b.1 (2020).
- 2 Torre, Y. S.-D. I., Wadea, R., Rosas, V. & Herbst, K. L. Lipedema: friend and foe. *Hormone Molecular Biology and Clinical Investigation* **33**, doi:doi:10.1515/hmbci-2017-0076 (2018).
- 3 Herbst, K. L. *et al.* Standard of care for lipedema in the United States. *Phlebology* **36**, 779-796, doi:10.1177/02683555211015887 (2021).

- 4 Szolnoky, G. *et al.* Lymphedema treatment decreases pain intensity in lipedema. *Lymphology* **44**, 178-182 (2011).
- 5 Dudek, J. E., Bialaszek, W. & Gabriel, M. Quality of life, its factors, and sociodemographic characteristics of Polish women with lipedema. *BMC Womens Health* **21**, 27, doi:10.1186/s12905-021-01174-y (2021).
- 6 Aksoy, H., Karadag, A. S. & Wollina, U. Cause and management of lipedema-associated pain. *Dermatol Ther* **34**, e14364, doi:10.1111/dth.14364 (2021).
- 7 Alwardat, N. *et al.* The effect of lipedema on health-related quality of life and psychological status: a narrative review of the literature. *Eat Weight Disord* **25**, 851-856, doi:10.1007/s40519-019-00703-x (2020).
- 8 Herbst, K. L., Mirkovskaya, L., Bharhagava, A., Chava, Y. & Te, C. Lipedema Fat and Signs and Symptoms of Illness, Increase with Advancing Stage. *Archives of Medicine* **7** (2015).
- 9 Romeijn, J. R. M., de Rooij, M. J. M., Janssen, L. & Martens, H. Exploration of Patient Characteristics and Quality of Life in Patients with Lipoedema Using a Survey. *Dermatology and Therapy* **8**, 303-311, doi:10.1007/s13555-018-0241-6 (2018).
- 10 Kruppa, P. *et al.* Lipedema-Pathogenesis, Diagnosis, and Treatment Options. *Dtsch Arztebl Int* **117**, 396-403, doi:10.3238/arztebl.2020.0396 (2020).
- 11 Paolacci, S. *et al.* Genetics of lipedema: new perspectives on genetic research and molecular diagnoses. *Eur Rev Med Pharmacol Sci* **23**, 5581-5594, doi:10.26355/eurrev\_201907\_18292 (2019).
- 12 Child, A. H. *et al.* Lipedema: An inherited condition. *American Journal of Medical Genetics Part A* **152A**, 970-976, doi:<https://doi.org/10.1002/ajmg.a.33313> (2010).
- 13 Katzer, K., Hill, J. L., Mclver, K. B. & Foster, M. T. Lipedema and the Potential Role of Estrogen in Excessive Adipose Tissue Accumulation. *Int J Mol Sci* **22**, doi:10.3390/ijms222111720 (2021).
- 14 Dudek, J. E., Bialaszek, W., Ostaszewski, P. & Smidt, T. Depression and appearance-related distress in functioning with lipedema. *Psychol Health Med* **23**, 846-853, doi:10.1080/13548506.2018.1459750 (2018).
- 15 Angst, F., Benz, T., Lehmann, S., Sandor, P. & Wagner, S. Common and Contrasting Characteristics of the Chronic Soft-Tissue Pain Conditions Fibromyalgia and Lipedema. *J Pain Res* **14**, 2931-2941, doi:10.2147/JPR.S315736 (2021).
- 16 Forner-Cordero, I., Szolnoky, G., Forner-Cordero, A. & Kemény, L. Lipedema: an overview of its clinical manifestations, diagnosis and treatment of the disproportional fatty deposition syndrome - systematic review. *Clinical Obesity* **2**, 86-95, doi:10.1111/j.1758-8111.2012.00045.x (2012).
- 17 Baumgartner, A., Hueppe, M., Meier-Vollrath, I. & Schmeller, W. Improvements in patients with lipedema 4, 8 and 12 years after liposuction. *Phlebology* **36**, 152-159, doi:10.1177/0268355520949775 (2021).
- 18 Krüger, K. Inflammation during Obesity ? Pathophysiological Concepts and Effects of Physical Activity. *Deutsche Zeitschrift für Sportmedizin* **68**, 163-169, doi:10.5960/dzsm.2017.285 (2017).
- 19 Atan, T. & Bahar-Ozdemir, Y. The Effects of Complete Decongestive Therapy or Intermittent Pneumatic Compression Therapy or Exercise Only in the Treatment of Severe Lipedema: A Randomized Controlled Trial. *Lymphat Res Biol* **19**, 86-95, doi:10.1089/lrb.2020.0019 (2021).
- 20 Donahue, P. M. C. *et al.* Physical Therapy in Women with Early Stage Lipedema: Potential Impact of Multimodal Manual Therapy, Compression, Exercise, and Education Interventions. *Lymphat Res Biol*, doi:10.1089/lrb.2021.0039 (2021).
- 21 Halk, A. B. & Damstra, R. J. First Dutch guidelines on lipedema using the international classification of functioning, disability and health. *Phlebology* **32**, 152-159, doi:10.1177/0268355516639421 (2017).

- 22 Bull, F. C. *et al.* World Health Organization 2020 guidelines on physical activity and sedentary behaviour. *British journal of sports medicine* **54**, 1451-1462, doi:10.1136/bjsports-2020-102955 (2020).
- 23 Rice, D. *et al.* Exercise-Induced Hypoalgesia in Pain-Free and Chronic Pain Populations: State of the Art and Future Directions. *J Pain* **20**, 1249-1266, doi:10.1016/j.jpain.2019.03.005 (2019).
- 24 Sluka, K. A., Frey-Law, L. & Hoeger Bement, M. Exercise-induced pain and analgesia? Underlying mechanisms and clinical translation. *Pain* **159 Suppl 1**, S91-S97, doi:10.1097/j.pain.0000000000001235 (2018).
- 25 Borg, G. *Borg's perceived exertion and pain scales.* (Human Kinetics, 1998).
- 26 Hoffman, M. D. *et al.* Intensity and duration threshold for aerobic exercise-induced analgesia to pressure pain. *Arch Phys Med Rehabil* **85**, 1183-1187, doi:10.1016/j.apmr.2003.09.010 (2004).
- 27 Koltyn, K. F. Analgesia following exercise: a review. *Sports medicine (Auckland, N.Z)* **29**, 85-98, doi:10.2165/00007256-200029020-00002 (2000).
- 28 Naugle, K. M., Naugle, K. E., Fillingim, R. B., Samuels, B. & Riley, J. L., 3rd. Intensity thresholds for aerobic exercise-induced hypoalgesia. *Medicine and science in sports and exercise* **46**, 817-825, doi:10.1249/MSS.0000000000000143 (2014).
- 29 Vaegter, H. B., Handberg, G. & Graven-Nielsen, T. Similarities between exercise-induced hypoalgesia and conditioned pain modulation in humans. *Pain* **155**, 158-167, doi:10.1016/j.pain.2013.09.023 (2014).
- 30 Fimland, M. S. *et al.* Leisure-time physical activity and disability pension: 9 years follow-up of the HUNT Study, Norway. *Scand J Med Sci Sports* **25**, e558-565, doi:10.1111/sms.12369 (2015).
- 31 Lahti, J., Holstila, A., Manty, M., Lahelma, E. & Rahkonen, O. Changes in leisure time physical activity and subsequent disability retirement: A register-linked cohort study. *Int J Behav Nutr Phys Act* **13**, 99, doi:10.1186/s12966-016-0426-2 (2016).
- 32 Landmark, T., Romundstad, P., Borchgrevink, P. C., Kaasa, S. & Dale, O. Associations between recreational exercise and chronic pain in the general population: evidence from the HUNT 3 study. *Pain* **152**, 2241-2247, doi:10.1016/j.pain.2011.04.029 (2011).
- 33 Geneen, L. J. *et al.* Physical activity and exercise for chronic pain in adults: an overview of Cochrane Reviews. *The Cochrane database of systematic reviews* **4**, CD011279, doi:10.1002/14651858.CD011279.pub3 (2017).
- 34 Hallam, K. T., Bilsborough, S. & de Courten, M. "Happy feet": evaluating the benefits of a 100-day 10,000 step challenge on mental health and wellbeing. *BMC psychiatry* **18**, 19, doi:10.1186/s12888-018-1609-y (2018).
- 35 Martinsen, E. W. Physical activity in the prevention and treatment of anxiety and depression. *Nord J Psychiatry* **62 Suppl 47**, 25-29, doi:10.1080/08039480802315640 (2008).
- 36 Mucke, M., Ludyga, S., Colledge, F. & Gerber, M. Influence of Regular Physical Activity and Fitness on Stress Reactivity as Measured with the Trier Social Stress Test Protocol: A Systematic Review. *Sports medicine (Auckland, N.Z)* **48**, 2607-2622, doi:10.1007/s40279-018-0979-0 (2018).
- 37 Xie, Y. *et al.* Effects of Exercise on Sleep Quality and Insomnia in Adults: A Systematic Review and Meta-Analysis of Randomized Controlled Trials. *Front Psychiatry* **12**, 664499, doi:10.3389/fpsy.2021.664499 (2021).
- 38 Martland, R., Mondelli, V., Gaughran, F. & Stubbs, B. Can high-intensity interval training improve physical and mental health outcomes? A meta-review of 33 systematic reviews across the lifespan. *Journal of Sports Sciences* **38**, 430-469, doi:10.1080/02640414.2019.1706829 (2020).
- 39 Da Cruz Fernandes, I. M., Pinto, R. Z., Ferreira, P. & Lira, F. S. Low back pain, obesity, and inflammatory markers: exercise as potential treatment. *Journal of Exercise Rehabilitation* **14**, 168-174, doi:10.12965/jer.1836070.035 (2018).
- 40 Poquet, N. The Brief Pain Inventory (BPI). *Journal of PHYSIOTHERAPY* **62**, 1 (2016).

- 41 Wewege, M., Van Den Berg, R., Ward, R. E. & Keech, A. The effects of high-intensity interval training vs. moderate-intensity continuous training on body composition in overweight and obese adults: a systematic review and meta-analysis. *Obesity Reviews* **18**, 635-646, doi:10.1111/obr.12532 (2017).
- 42 Rugbeer, N., Constantinou, D. & Torres, G. Comparison of High-Intensity Training Versus Moderate-Intensity Continuous Training on Cardiorespiratory Fitness and Body Fat Percentage in Persons with Overweight or Obesity: A Systematic Review and Meta-Analysis of Randomized Controlled Trials. *J Phys Act Health* **18**, 610-623, doi:10.1123/JPAH.2020-0335 (2021).
- 43 Keating, S. E. *et al.* Effect of aerobic exercise training dose on liver fat and visceral adiposity. *J Hepatol* **63**, 174-182, doi:10.1016/j.jhep.2015.02.022 (2015).
- 44 Felmerer, G. *et al.* Adipose Tissue Hypertrophy, An Aberrant Biochemical Profile and Distinct Gene Expression in Lipedema. *The Journal of surgical research* **253**, 294-303, doi:10.1016/j.jss.2020.03.055 (2020).
- 45 Chan, A. W. *et al.* SPIRIT 2013 explanation and elaboration: guidance for protocols of clinical trials. *Bmj* **346**, e7586, doi:10.1136/bmj.e7586 (2013).
- 46 Hays, R. D. & Morales, L. S. The RAND-36 measure of health-related quality of life. *Ann Med* **33**, 350-357, doi:10.3109/07853890109002089 (2001).

## Acknowledgements

The study was supported by grants from the DAM Foundation Joint Research Committee between St. Olavs hospital and the Faculty of Medicine and Health Sciences, NTNU (FFU). The funders have/had no role in study design, data collection and analysis, decision to publish or preparation of the manuscript.

## Author contributions

JCS: Conceptualization, methodology, project administration, writing – original draft

ANN: Project administration, writing – review & editing

RMP: Conceptualization, methodology, writing– review & editing

RU: Writing– review & editing

LM: Conceptualization, methodology, writing – review & editing

ILN: Methodology, writing – review & editing

SK: Conceptualization, writing review & editing

KMO: Methodology, writing – review & editing

GE: Writing – review & editing

TB: Writing – review & editing

TD: Writing – review & editing

TFB: Methodology, writing – review & editing

SN: Conceptualization, methodology, project administration, writing – original draft

GG: Conceptualization, methodology, writing – original draft

ML: Conceptualization, methodology, writing – original draft

AET: Conceptualization, methodology, project administration, writing – original draft

AB: Conceptualization, supervision, methodology, project administration, writing – original draft

## Competing interests

The authors declare no competing interests.

### Table 1. Design Table

| Question                                                                                                                                | Hypothesis                                                                                                                                                                                                                   | Sampling plan                                                                                                                                   | Analysis Plan                                                                                                                                                                                                                                                                                                                                                                                    | Interpretation given to different outcomes                                                                                                                                                                                                                                                                                                      |
|-----------------------------------------------------------------------------------------------------------------------------------------|------------------------------------------------------------------------------------------------------------------------------------------------------------------------------------------------------------------------------|-------------------------------------------------------------------------------------------------------------------------------------------------|--------------------------------------------------------------------------------------------------------------------------------------------------------------------------------------------------------------------------------------------------------------------------------------------------------------------------------------------------------------------------------------------------|-------------------------------------------------------------------------------------------------------------------------------------------------------------------------------------------------------------------------------------------------------------------------------------------------------------------------------------------------|
| Determine whether 12 weeks of HIIT improve pain levels in women with lipedema.                                                          | <p>H1: 12 weeks of HIIT reduces pain levels in lipedema patients.</p> <p>H0: 12 weeks of HIIT has no effect on pain levels in lipedema patients.</p>                                                                         | Compare changes in self-reported pain in the intervention period and in the control period using the BPI questionnaire.                         | We will apply linear mixed models (LMM) with repeated measures (random intercept model) using age and baseline adipose tissue mass (%) in the lower limbs as covariates to compare the changes in pain levels during the intervention period as compared to the control period. Model assessment using various types of residual analyses may lead to performing the LMM on a transformed scale. | <p>If we find a significant difference (<math>p &lt; 0.05</math>), we will interpret this as evidence that regular exercise reduces pain in lipedema patients.</p> <p>If no significant difference is found (<math>p &lt; 0.05</math>), we will interpret this as we have no evidence that regular exercise has a large effect pain levels.</p> |
| Determine whether 12 weeks of HIIT reduces total adipose tissue mass and adipose tissue mass in the lower limbs in women with lipedema. | <p>H1: 12 weeks of HIIT will reduce total adipose mass and adipose mass in the lower limbs in lipedema patients.</p> <p>H0: 12 weeks of HIIT have no effect on total adipose mass and adipose mass in the lower limbs in</p> | Compare changes in adipose tissue mass (total and lower limbs) in the intervention period and the control period using the Bioimpedance weight. | We will apply LMM with repeated measures (random intercept model) using age as covariate to compare the changes in adipose tissue mass (both total and in the lower limbs) during the intervention period as compared to the control period. Model assessment using various types of residual analyses may lead to performing the LMM on a transformed scale.                                    | <p>If we find a significant difference (<math>p &lt; 0.05</math>), we will interpret this as evidence that regular exercise reduces adipocyte mass in patients.</p> <p>If no significant difference is found (<math>p &lt; 0.05</math>), we will interpret this as we have no evidence that regular</p>                                         |

|                                                                                                    |                                                                                                                                                                                             |                                                                                                                                  |                                                                                                                                                                                                                                                                                                                                                                                |                                                                                                                                                                                                                                                                                                                                              |
|----------------------------------------------------------------------------------------------------|---------------------------------------------------------------------------------------------------------------------------------------------------------------------------------------------|----------------------------------------------------------------------------------------------------------------------------------|--------------------------------------------------------------------------------------------------------------------------------------------------------------------------------------------------------------------------------------------------------------------------------------------------------------------------------------------------------------------------------|----------------------------------------------------------------------------------------------------------------------------------------------------------------------------------------------------------------------------------------------------------------------------------------------------------------------------------------------|
|                                                                                                    | lipedema patients.                                                                                                                                                                          |                                                                                                                                  |                                                                                                                                                                                                                                                                                                                                                                                | exercise affects adipocyte mass.                                                                                                                                                                                                                                                                                                             |
| Determine whether 12 weeks of HIIT improves health-related quality of life in women with lipedema. | <p>H1: 12 weeks of HIIT improves health-related quality of life in lipedema patients.</p> <p>H0: 12 weeks of HIIT has no effect on health-related quality of life in lipedema patients.</p> | Compare changes in self-reported quality of life in the intervention period and the control period using the SF36 questionnaire. | We will apply LMM with repeated measures (random intercept model) using age and baseline adipose tissue mass (%) in the lower limbs as covariates to compare the changes in quality of life during the intervention period as compared to the control period. Model assessment using various types of residual analyses may lead to performing the LMM on a transformed scale. | <p>If we find a significant difference (<math>p &lt; 0.05</math>), we will interpret this as evidence that regular exercise improves quality of life in patients.</p> <p>If no significant difference is found (<math>p &lt; 0.05</math>), we will interpret this as we have no evidence that regular exercise improves quality of life.</p> |
